# Supplementary material for: Neogenesis and maturation of transient Golgi-like cisternae in a simple eukaryote
Source: Oxford University Press journal article supplement (doi:10.1242/jcs.049411), 2009-07-22
Supplement: jcs049411-sup-049411-figs1.pdf [file jcs049411-sup-049411-figs1.pdf]

S.cerevisi : \*RMNDELRNAVLLVFAANKQLDFANAAETDKLGLHSIRNRFPQATCATSGDGLYBGLWLSNLSRKNST----- : 181  
 A.thaliana : RMNDELRDAVLVFAANKQLDFANAAETDKLGLHSIRNRFPQATCATSGDGLYBGLWLSNLSRKNST----- : 181  
 M.musculus : RMNDELRDAVLVFAANKQLDFANAAETDKLGLHSIRNRFPQATCATSGDGLYBGLWLSNLSRKNST----- : 181  
 T.brucei : RMNDELRNAVLLVFAANKQLDFANAAETDKLGLHSIRNRFPQATCATSGDGLYBGLWLSNLSRKNST----- : 182  
 L.major : KLMADELRNAVLLVFAANKQLDFANAAETDKLGLHSIRNRFPQATCATSGDGLYBGLWLSNLSRKNST----- : 182  
 D.melanoga : RMNDELRDAVLVFAANKQLDFANAAETDKLGLHSIRNRFPQATCATSGDGLYBGLWLSNLSRKNST----- : 182  
 H.sapiens : RMNDELRDAVLVFAANKQLDFANAAETDKLGLHSIRNRFPQATCATSGDGLYBGLWLSNLSRKNST----- : 181  
 G.lambliia : LHTLGLDELRDAVLVFAANKQLDFANAAETDKLGLHSIRNRFPQATCATSGDGLYBGLWLSNLSRKNST----- : 191  
 l e d l r a v l l f a n k q l d f a n a a e t d k l g l h s i r n r f p q a t c a t s g d g l y b g l w l s n l s r k n s t  
 l e d l r a v l l f a n k q l d f a n a a e t d k l g l h s i r n r f p q a t c a t s g d g l y b g l w l s n l s r k n s t
